# Supplementary material for: Enhanced genome editing in human iPSCs with CRISPR-CAS9 by co-targeting ATP1a1
Source: PeerJ. 2020 May 1;8:e9060. doi: 10.7717/peerj.9060 (PMC7197401; doi:10.7717/peerj.9060)
Supplement: Data S1 — Cell viability assay used to determine the impact of digoxin and ouabain on wild type and ATP1a1 (R118/D129) iPSCs. [file peerj-08-9060-s009.xlsx]

## Sheet: Sheet1
Cell Viability assay
ATP1a1 (Q118/N129)										ATP1a1 (R118/D129)
Dose ( nM)	0	15.625	31.25	62.5	125	250	500	1000	2000	Dose ( nM)	0	15.625	31.25	62.5	125	250	500	1000	2000
Ouabain	1.0221	0.187482	0.107214	0.0583119	0.0114058	0.00185344	0.00684346	0.00413459	0.00727117	Ouabain	1.00385	0.976284	0.934876	0.972166	0.962329	0.937965	1.00202	0.960613	0.928585
	0.995153	0.201169	0.105646	0.0561734	0.0145423	0.00185344	0.00769889	0.00484745	0.0081266		1.01094	0.944142	0.940138	1.02856	0.959698	0.953292	0.963587	0.957982	0.937393
	0.982749	0.185629	0.105931	0.0534645	0.0135443	0.00114058	0.00556031	0.0071286	0.0045623		0.985206	0.915316	0.915774	0.985092	0.932589	0.967705	0.936363	0.931559	0.934991
Mean	1	0.191427	0.106264	0.0559833	0.0131641	0.00161582	0.00670088	0.00537021	0.00665336	Mean	1	0.945247	0.930263	0.995272	0.951538	0.952987	0.967324	0.950051	0.933656
S.D.	0.0201178	0.00848792	0.000835396	0.00242931	0.00160248	0.00041157	0.00107639	0.00156397	0.00186073	S.D.	0.0132936	0.0304989	0.0128206	0.0295424	0.0164638	0.0148725	0.0329879	0.0160688	0.00455298
Digoxin	1.00774	0.757276	0.723799	0.105215	0.0709178	0.0273286	0.00232293	0.00655887	0.00751537	Digoxin	1.00629	0.974071	0.913314	0.988915	0.994323	0.838518	0.954049	0.994093	0.937018
	0.947893	0.89064	0.330266	0.109861	0.0713277	0.0256889	0.00300615	0.00259622	0.00382601		0.979249	0.975912	0.959687	0.958766	0.960032	0.894212	0.949101	0.93184	0.969353
	1.04436	0.757823	0.109178	0.125985	0.0733774	0.0219995	0.00587565	0.00327944	0.00478251		1.01446	1.0033	0.976372	0.999501	0.977753	0.875455	0.921023	0.97292	0.993978
Mean	1	0.801913	0.219722	0.113687	0.0718743	0.0250057	0.00373491	0.00414484	0.00537463	Mean	1	0.984427	0.949791	0.982394	0.977369	0.869395	0.941391	0.966284	0.966783
S.D.	0.0486989	0.0768403	0.156333	0.0109007	0.00131774	0.00272944	0.00188515	0.00211834	0.00191463	S.D.	0.0184294	0.0163691	0.0326733	0.0211358	0.0171487	0.0283373	0.0178114	0.0316526	0.0285667

## Sheet: Wild type oubain ANOVA
Anova: Single Factor
SUMMARY
Groups	Count	Sum	Average	Variance
Column 1	3	3	1	0.000404726
Column 2	3	0.57428	0.191427	7.20449e-05
Column 3	3	0.318791	0.106264	6.97886e-07
Column 4	3	0.16795	0.0559833	5.90154e-06
Column 5	3	0.0394924	0.0131641	2.56795e-06
Column 6	3	0.00484745	0.00161582	1.6939e-07
Column 7	3	0.0201027	0.00670088	1.15863e-06
Column 8	3	0.0161106	0.00537021	2.44599e-06
Column 9	3	0.0199601	0.00665336	3.46233e-06
ANOVA
Source of Variation	SS	df	MS	F	P-value	F crit
Between Groups	2.51267	8	0.314084	5731.75	4.84715e-29	2.51016
Within Groups	0.00098635	18	5.47972e-05
Total	2.51366	26

## Sheet: Wild type Digoxin ANOVA
Anova: Single Factor
SUMMARY
Groups	Count	Sum	Average	Variance
Column 1	3	3	1	0.00237158
Column 2	3	2.40574	0.801913	0.00590443
Column 3	3	1.16324	0.387748	0.0969178
Column 4	3	0.341061	0.113687	0.000118824
Column 5	3	0.215623	0.0718743	1.73644e-06
Column 6	3	0.0750171	0.0250057	7.44987e-06
Column 7	3	0.0112047	0.00373491	3.55378e-06
Column 8	3	0.0124345	0.00414484	4.48735e-06
Column 9	3	0.0161239	0.00537463	3.66581e-06
ANOVA
Source of Variation	SS	df	MS	F	P-value	F crit
Between Groups	3.49493	8	0.436867	37.3272	1.16593e-09	2.51016
Within Groups	0.210667	18	0.0117037
Total	3.7056	26
