# Supplementary material for: Enhanced genome editing in human iPSCs with CRISPR-CAS9 by co-targeting ATP1a1
Source: PeerJ. 2020 May 1;8:e9060. doi: 10.7717/peerj.9060 (PMC7197401; doi:10.7717/peerj.9060)
Supplement: Data S2 — TIDE(R) analyses of reveals percent of cells with expected INDELs and HDR mediated mutations. [file peerj-08-9060-s010.xlsx]

## Sheet: Sheet4
	SV20		K3		SV20		K3
	Indel		Indel		HDR		HDR
	Digoxin (-)	Digoxin (+)	Digoxin -	Digoxin +	Digoxin (-)	Digoxin (+)	Digoxin -	Digoxin +
percentage of population	0.132	0.416	0.152	0.432	0.119	0.23	0.055	0.154
	0.275	0.379	0.178	0.439	0.089	0.221	0.009	0.148
	0.279	0.54	0.072	0.471	0.095	0.192	0.041	0.149
	0.249	0.515	0.071	0.462	0.067	0.149	0.038	0.153
	0.256	0.493	0.115	0.264	0.069	0.157	0.066	0.075
	0.266			0.274	0.059			0.115
Mean	0.242833	0.4686	0.1176	0.390333	0.083	0.1898	0.0418	0.132333
Stdev	0.0554524	0.0682664	0.0476686	0.0951224	0.0223786	0.0365199	0.0215105	0.031646
p-value	0.000511279		0.000334045		0.00133269		0.000364051
