# Supplementary material for: Enhanced genome editing in human iPSCs with CRISPR-CAS9 by co-targeting ATP1a1
Source: PeerJ. 2020 May 1;8:e9060. doi: 10.7717/peerj.9060 (PMC7197401; doi:10.7717/peerj.9060)
Supplement: Table S1 [file peerj-08-9060-s001.xlsx]

## Sheet: Sheet1
		Donor template	Sequence
		ATP1A1 Exon4	CACTGCTTCTCAGGGATTAACATCTGCTCGTGCAGCTGAGATCCTGGCGCGAGATGGTCCCAACGCCCTCACTCCCCCTCCCACTACTCCTGAATGGATCAAGTTTTGTCGGCAGCTCTTTGGG GGGTTCTCAATGTTACTGTGGATTGGAGCGATTCTTTGTTTCTTGGCTTATAGCATCCGGGCTGCTACAGAAGAGGAACCTCAAAACGATGATGTGAGTTCTGGAATTCAGCATATGGATTTGTAG TACACATCAGATATCTTCTCCGTCTTTGTCTCCCACTTCTTCTCAATTACCACTCATTACTTAATGGTTATGAACTCATTACTTAATGGTTATGAACAGCTGTTGCCTTCAAGGCTCATCCATTCTTCC TTCGTTTCCATTTCCTC…
		DGUOK Exon 1	GATCCCGATACCTAGGGCGGAAGTGCTCTCGGCGGAAGTGATCGCTGTGTGAATCGTGGGTGGGATGGCCGCGGGCCGCCTCTTTCTAAGTCGGCTTCGAGCACCCTTCAGTTCCATGGCCA AGAGCCCACTCGAGGGCGTTTCCTCCTCCAGAGGCCTGCACGCGGGGCGCGGGCCCCGAAGACTCAGCATCGAAGGCAGCATTGGTAAGGGCCGGAAAGCGGCTGCCAAGCCTTGGCCTC CGCCACGCAGGCGACAGAGGCTGGGAAAGGAGCTGGGCCCGGAATGGCCTGCGTCTGATGCGGCCGGCCTCTTTTTCTGGGCTGCGAGGAGAGCCTTTCCCCTCGCAAAGTGCACTGTGTA TCTTTGCCTCCTTGTTTTTAGGATATCGGGCCT…
		DGUOK Exon 4	GGATTGATGAGGAGCTAGAAAGGTTAAGTGGTTTGAACAGACATGGAACAAGTTGGTTATTGATTTTTCTGCTTCTCTCTCTCTCTCGTGCCTTTCATTCCATTTCCCATTCTCCTGCCCTCCCCA TTCCCATCCCACTTCCAACCAGGTATATCTTTGCAAAGAATCTTTTTGAAAATGGTTCCCTCAGTGACATCGAGTGGCATATCTATCGCGACTGGCATTCTTTTCTCCTGTGGGAGTTTGCCAGCC GGATCACATTACATGGCTTCATCTACCTCCAGGCTTCTCCCCAGGTAACACTGAACCTACAACCTTAGACTTTAGGGCCATATGAAACCTAAGAAGTGACATTCTCCAAGCCCCTGATTTTCTGG TTGGAGAGATTAGAGCGTA…
		GATA6 Exon 4	ATTTCATTTATAATAAAACAGATACATACTTGTTGATGACAGGGACAAAATACCTTAATGTATGTATGTAATATATATATATGTCACTTATATTTTTCCACTTATGTTCTTGTACTGTTTCTAGCCTTC ATCACGGCGGCTTGGATTGTCCTGTGCCAACTGTCACACCACAACTACCACCTTATGACGCAGAAACGCCGAATTCGAACCCGTGTGCAATGCTTGTGGACTCTACATGAAACTCCATGGGGTA TGCCATGTATTCTGCTCACTTGTATATACATTTAGTATCTGGTTTGTATGTGATATCAGTTACAAAGAATCAGCAAATGAAAGATACTCAAGTGAAAAATTTGAATGCATATAATTTATTACTGAATA TGTTTAATATATTCA…
		POLG Exon 10	AGAGGATTCCATGGGGGTCCTGGCTAAAGCATCCCAGAGGAGGGGATGGCGGCTGTAGGCTGGGGTCACCAGAAAGCCCCAGGGCTTTGGAGGGTGGGTGGGGACATTGTGAGAGAGAGA ACCTTCCCCCCAACAACTGCCCTTACCATCGTGACACTGCTGTCTTCCTGCTGGGACGTAGATGGTACCGGAAGCTCTGCTAGCGGCTAGACGACCCTGCATGGACCCCGGGCCCCAGCCTC CTCAGCCTGCAGATGCGGGTCACACCTAAACTCATGGCACTTACCTGGGATGGCTTCCCTCTGCACTACTCAGAGCGTCATGGCTGGGGCTACTTGGTGCCTGGGCGGCGGGACAACCTGGC CAAGCTGCCGACAGGTACCACCCTGGAGTCAG…
		RYR2 Exon 50	CTGTGTTTAAAATGTAAGAAGTCTAGAAAGCAGCCATTTGTAATCTATCCTGTATATGACACAGCCATTGACACCAAAATTCACTTCTCTCTTTTAGATGGGAATGTGGTGGAACCTGACATGTCT GCGGGGTTTTGCCCAGATCACAAGGCAGCCATGGTTTTATTCCTTGACAGGGTCTATGGGATTGAGGTTCAAGACATCCTCCTGCATCTTCTTGAGGTTGGCTTTCTGCCAGATCTCCGGGCGG CTGCTTCTTTAGATACGGTGAGATTGGAGCGATGGACTTCCTCCTCTCTTGACTCTTCACTCTGTGCCTTATGATGTTCTTTTTTATATATCCATTCATTAATTTATTGACAATGAATGTTTATTGAG TACCTGTTATATTTTCAG…
