# Supplementary material for: Enhanced genome editing in human iPSCs with CRISPR-CAS9 by co-targeting ATP1a1
Source: PeerJ. 2020 May 1;8:e9060. doi: 10.7717/peerj.9060 (PMC7197401; doi:10.7717/peerj.9060)
Supplement: Table S2 [file peerj-08-9060-s002.xlsx]

## Sheet: Sheet1
	Primers name	Sequence
	ATP1A1 Exon4 Forward	gactggctcatcagcagaatta
	ATP1A1 Exon4 Reverse	GTGGATGTGCCAACATGAATC
	DGUOK Exon4 Forward	TCCATCTGGAAAGGTGTGATTT
	DGUOK Exon4 Reverse	AAGGAAACCACTGAGACTACAC
	DGUOK Exon1 Forward	GAG TGA GCA GCG ATA CCT AGG G
	DGUOK Exon1 Reverse	CAA ATA TGT TCC TGT GGG CGG G
	GATA6 Exon4 Forward	tcaaatctatagggtccagcatac
	GATA6 Exon4 Reverse	CGTTTGCAATAGTTCAACTGG
	RYR2 Exon50 Forward	TGCCATGTCTTGTATCCTGTATG
	RYR2 Exon50 Reverse	GGTCAGTGGGAAGTTTCTTGA
	POLG Exon10 Forward	gggtatgcttttgtgtcctggc
	POLG Exon10 Reverse	cctaagccttacctgtaggggc
